# Supplementary material for: Broad-spectrum degradation of fluoroquinolone antibiotics by Hemin-His-Fe nanozymes with peroxidase-like activity
Source: Royal Society of Chemistry journal article supplement (doi:10.1039/d4tb00508b), 2024-01-01
Supplement: d4tb00508b1.pdf [file d4tb00508b1.pdf]

## **Broad-spectrum degradation of fluoroquinolone antibiotics by Hemin-His-Fe nanozymes with peroxidase-like activity**

Xin Geng<sup>a</sup>, Kexu Song<sup>a</sup>, Qingying Hu<sup>a</sup>, Yue Yin<sup>b</sup>, Haisong Li<sup>b\*</sup>, Xiyun Yan<sup>a,c,d\*</sup>, Bing Jiang<sup>a,c\*</sup>

<sup>a</sup> Nanozyme Laboratory in Zhongyuan, School of Basic Medical Sciences, Zhengzhou University, Zhengzhou, Henan, 450001, China

<sup>b</sup> College of Ecology and Environment, Zhengzhou University, Zhengzhou 450001, China.

<sup>c</sup> Nanozyme Laboratory in Zhongyuan, Henan Academy of Innovations in Medical Science, Zhengzhou, Henan, 451163, China

<sup>d</sup> CAS Engineering Laboratory for Nanozyme, Key Laboratory of Biomacromolecules, Institute of Biophysics, Chinese Academy of Sciences, Beijing 100101, China.

\*Corresponding Authors:

Haisong Li, Email: [lhs@zzu.edu.cn](mailto:lhs@zzu.edu.cn)

Xiyun Yan, Email: [yanxy@ibp.ac.cn](mailto:yanxy@ibp.ac.cn)

Bing Jiang, Email: [jiangbing@zzu.edu.cn](mailto:jiangbing@zzu.edu.cn);

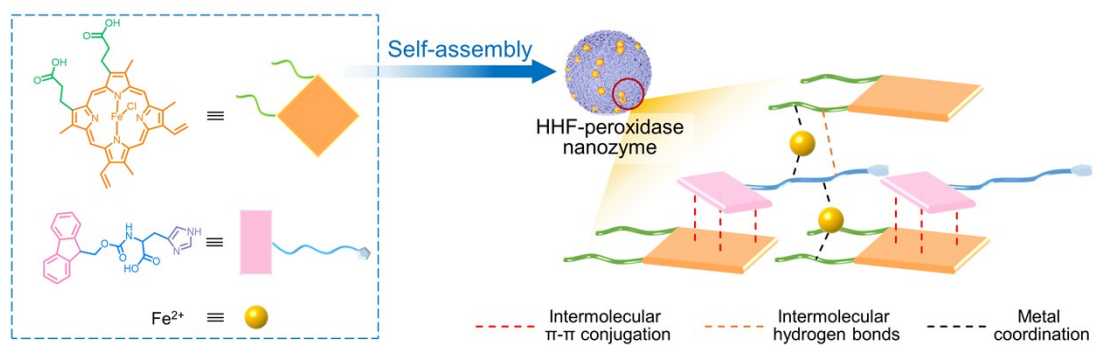

Figure S1. Schematic illustration of the self-assembly mechanism of HHF-peroxidase nanozyme.

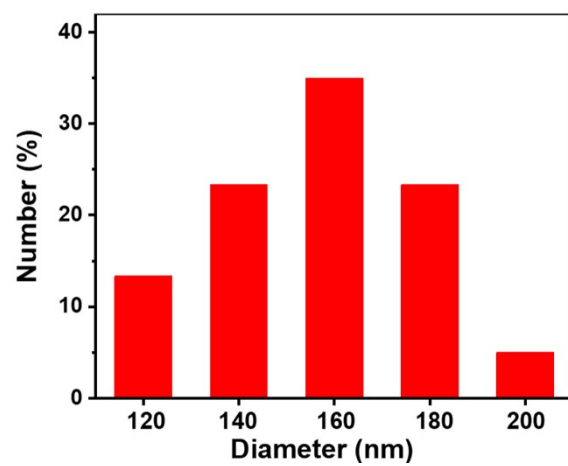

Figure S2. The diameter of HHF-peroxidase nanozyme according to TEM images.

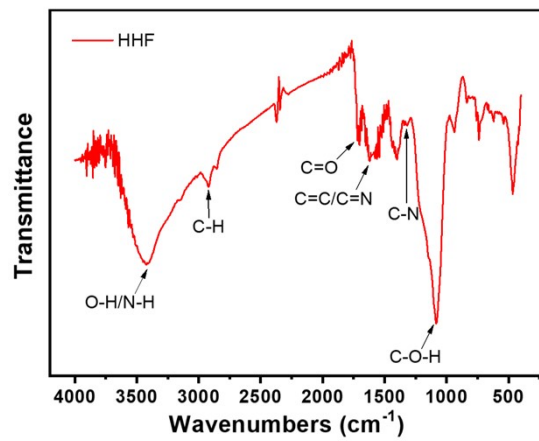

Figure S3. The FTIR spectrum of HHF-peroxidase nanozyme.

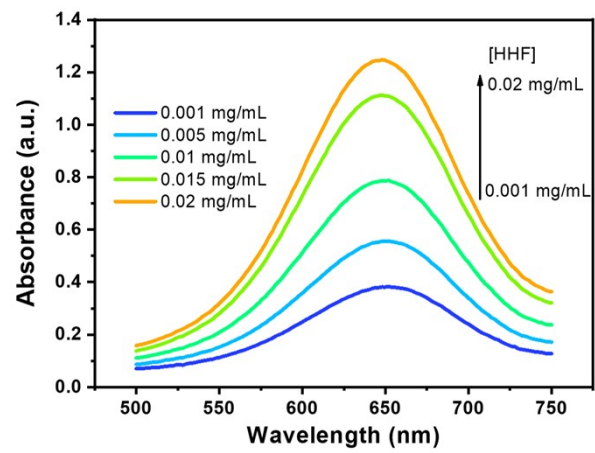

Figure S4. Peroxidase-like activity of HHF-oxidase nanozyme with different concentrations.

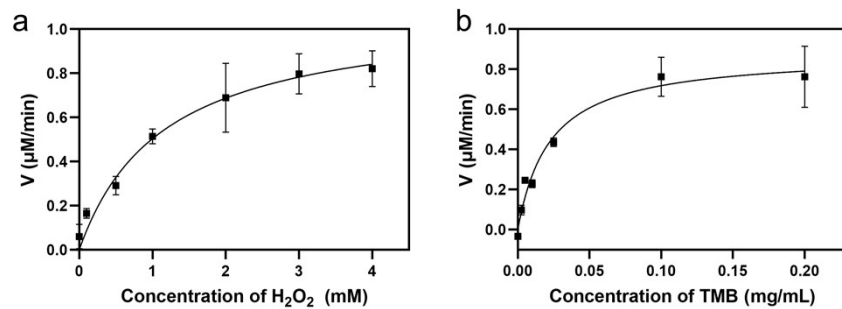

Figure S5. Kinetic assay for the peroxidase-like activity of HHF-peroxidase nanozyme with (a)  $\text{H}_2\text{O}_2$  and (b) TMB as substrate.

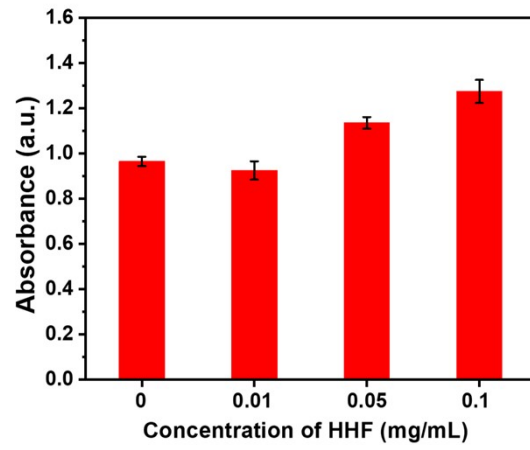

Figure S6. The absorbance of norfloxacin with different concentration of HHF-peroxidase nanozyme.

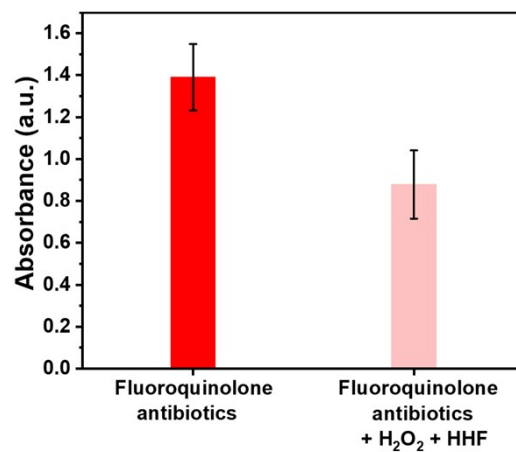

Figure S7. The absorbance of fluoroquinolone antibiotics without or with H<sub>2</sub>O<sub>2</sub> and HHF-peroxidase nanozyme.



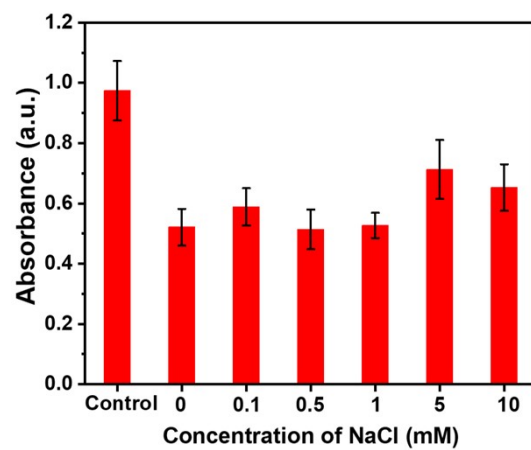

Figure S8. The absorbance of norfloxacin with H<sub>2</sub>O<sub>2</sub>, HHF-peroxidase nanozyme and different concentration of NaCl.

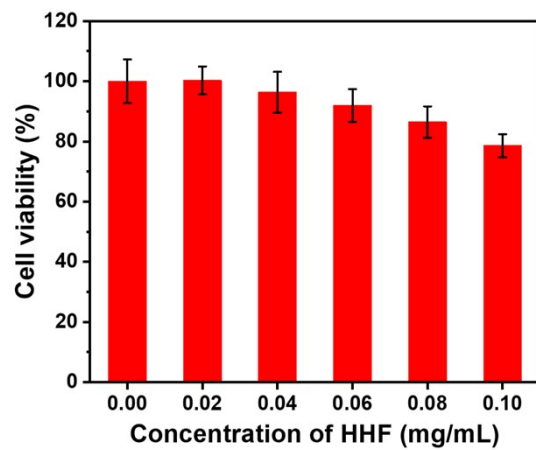

Figure S9. Cell viability of HUVEC cells treated with different concentration of HHF-peroxidase nanozyme.

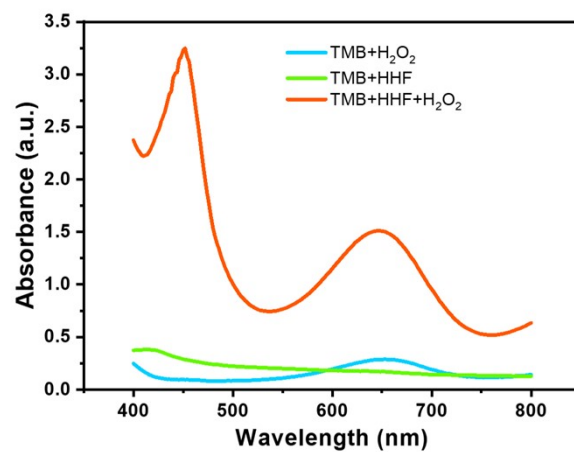

Figure S10. UV-vis absorbance spectra of TMB in different reaction systems of norfloxacin degradation conditions.

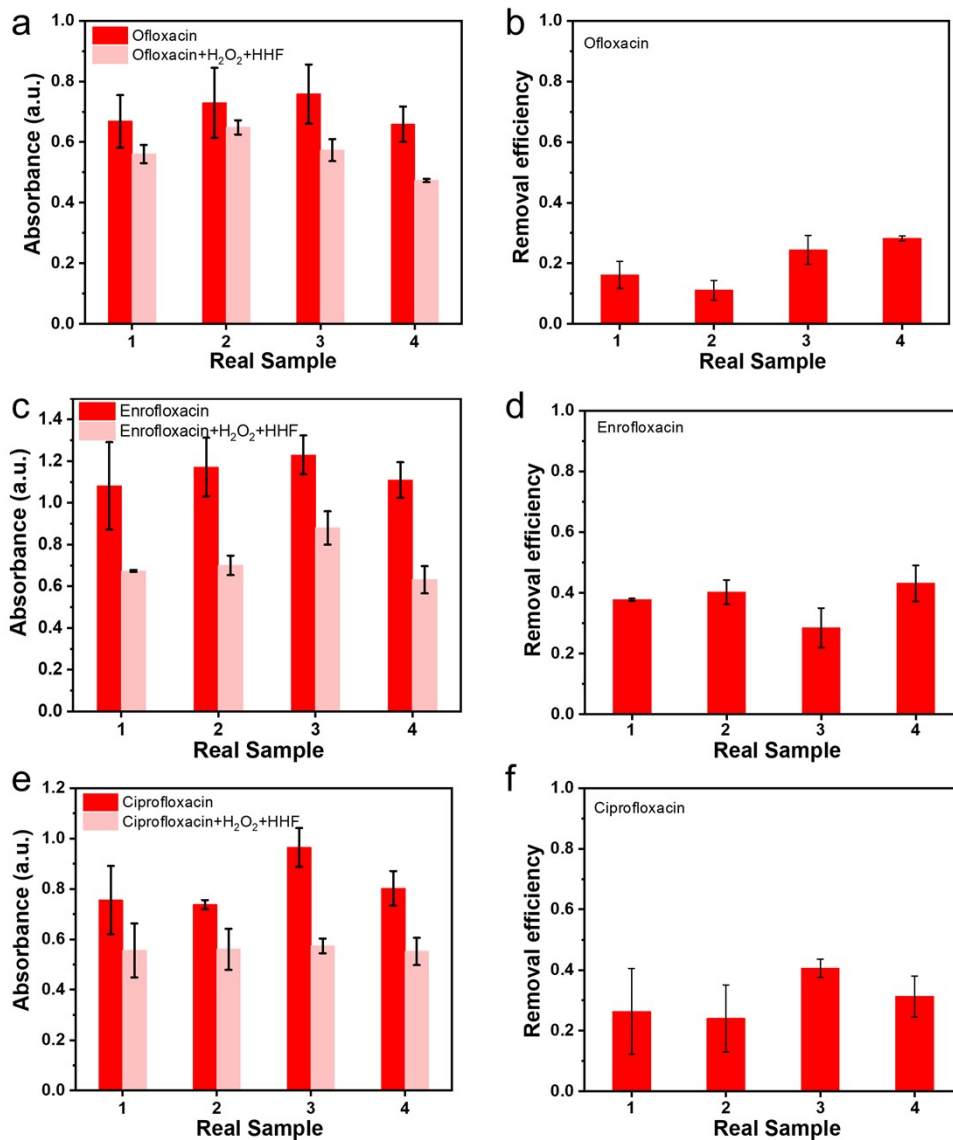

Figure S11. The absorbance and the removal efficiency of (a-b) ofloxacin, (c-d) enrofloxacin, (e-f) ciprofloxacin without or with H<sub>2</sub>O<sub>2</sub> and HHF-peroxidase nanozyme in four different real water samples.
